# Supplementary material for: Transition metal(ii) ion doping of CsPb2Br5/CsPbBr3 perovskite nanocrystals enables high luminescence efficiency and stability
Source: Royal Society of Chemistry journal article supplement (doi:10.1039/d2tc03300c), 2022-01-01
Supplement: d2tc03300c1.pdf [file d2tc03300c1.pdf]

## Supplementary Information

### Materials:

All chemical reagents materials were used as received and used without purification, unless otherwise noted. Fluorine-doped tin oxide (FTO) was gotten in Advanced Election Technology Co., Ltd. 99.9% Cesium carbonate ( $\text{Cs}_2\text{CO}_3$ ), 99.999% Zinc bromide ( $\text{ZnBr}_2$ ), 99.5% Copper bromide ( $\text{CuBr}_2$ ), 90% Oleic acid (OA), 95% Hexane and 99.5% Ethyl acetate, which were obtained from Sigma-Aldrich. 99.5% Toluene was from Sinopharm Chemical Reagent Co., Ltd. 99.999% Lead (II) bromide ( $\text{PbBr}_2$ ), Oleylamine (OAm, approximate C18 content 80-90%), 99.8% Dimethylsulfoxide (DMSO), 99.9% N, N-dimethylformamide (DMF) were gotten in Advanced Election Technology Co., Ltd. 48 % Hydrogen bromide (HBr) was gotten in Aladdin. 99% Nickel bromide ( $\text{NiBr}_2$ ) was purchased from Acros. 99% Iodide lithium (LiI), and 98% Lithium chloride (LiCl) were Acme and Shao Yuan, respectively.

### Synthesis of transition metal(II)-doped $\text{CsPb}_2\text{Br}_5/\text{CsPbBr}_3$ perovskite nanocrystals (NCs):

Firstly, OA (2mL) and  $\text{Cs}_2\text{CO}_3$  (0.2g) reagents were mixed in a 3-neck flask, which were dissolved at 120 °C to forming the Cs-oleate. Synthesis of  $\text{CsPb}_2\text{Br}_5/\text{CsPbBr}_3$  perovskite NCs are synthesized in the following two steps: One, the precursor solution was synthesized by  $V_{\text{OA}}/V_{\text{OAm}}=2:1$  (volume ratio) with 0.24 mmol  $\text{PbBr}_2$  dissolved in  $V_{\text{DMF}}/V_{\text{HBr}}=800:1$  (volume ratio). Two, by injecting 2 mL of precursor with 0.05 mL Cs-oleate into 20 mL hexane under vigorous stirring. In addition, the  $\text{PbBr}_2/\text{MBr}_2$  ( $\text{M}=\text{Ni}^{2+}$ ,  $\text{Cu}^{2+}$  and  $\text{Zn}^{2+}$  reagents) is changed by molar ratio in the precursor to prepare transition metal(II)-doped samples NCs.

### Purification of the transition metal(II)-doped $\text{CsPb}_2\text{Br}_5/\text{CsPbBr}_3$ perovskite NCs:

The above NCs solution was centrifuged with 15 % ethyl acetate (10 mL) at 8000 rpm for 5 min. Then, the precipitate was re-dispersed in 6 mL hexane at 5000

rpm for 5 min. Subsequently, the precipitate was re-dispersed in 4 mL hexane again at 3000 rpm for 5 min. The upper colloids were used to the characterization of optical properties and the ion exchange for PL, TCSPC, *etc.* We applied 2mL colloidal NCs evenly drip onto 4 cm<sup>2</sup> FTO and dried it at 25 °C for making the film to test the stability (Water and thermal stabilities). In addition, the precipitate was dried to test as XRD, *etc.*

#### **Anion exchange:**

According to our previous works.<sup>1-3</sup> Typically, 10 µL of ethanol solution of LiI or LiCl reagents were added to 1 mL of as-prepared NCs. The entire exchange reaction was completed in 10 s, and the colloids (for PL) were separated at 8000 rpm for 4 min to obtain powders (for XRD), which were dispersed in 4 mL toluene again at 3000 rpm for 4 min to PL characterization.

#### **Characterization**

TEM was measured by Netherlands Talos F200s microscope with high-resolution TEM images (FEI Tecnai G20). X-ray diffraction (XRD, Bruker D8 Advance) were obtained by X-ray diffraction under Cu K $\alpha$  radiation at 45 kV and 40 mA at room temperature. Pb/M (M=Ni<sup>2+</sup>, Cu<sup>2+</sup> and Zn<sup>2+</sup> reagents) doping molar ratios were analyzed by EDX in SEM. The PLQY was measured by C9920-02 (Hamamatsu photonics K.K., Japan). UV-vis absorption was obtained by Shimadzu UV-2550, China. XPS spectra were obtained using a Thermo-Fisher ESCA-LAB 250Xi. The steady state PL spectra and the TCSPC were tested by Florolog-3 (Horiba, USA).

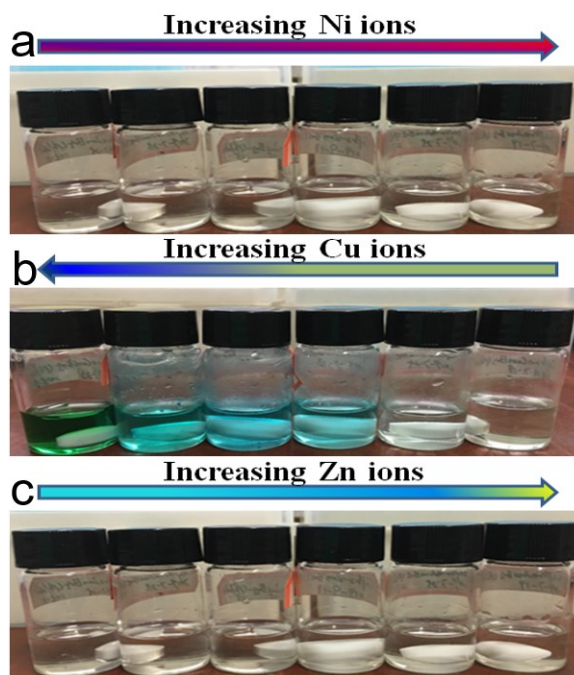

Fig. S1 The perovskite precursor solution with increasing concentration of transition metals: (a)  $\text{Ni}^{2+}$ -doped, (b)  $\text{Cu}^{2+}$ -doped, and (c)  $\text{Zn}^{2+}$ -doped perovskite precursor solution.

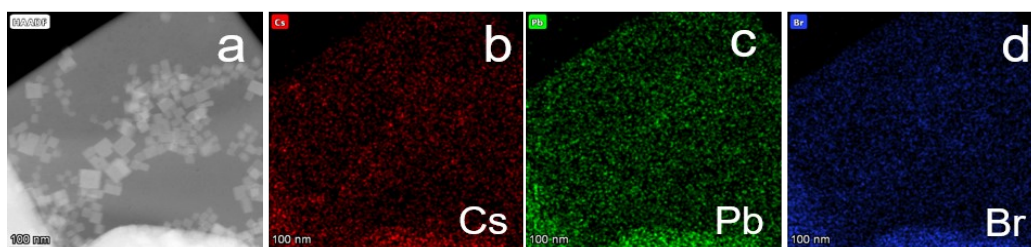

Fig. S2 (a) TEM image of undoped  $\text{CsPb}_2\text{Br}_5/\text{CsPbBr}_3$  NCs. (b)-(d) Elemental distribution mapping images of the Cs, Pb and Br in film detected by EDS mapping, respectively.

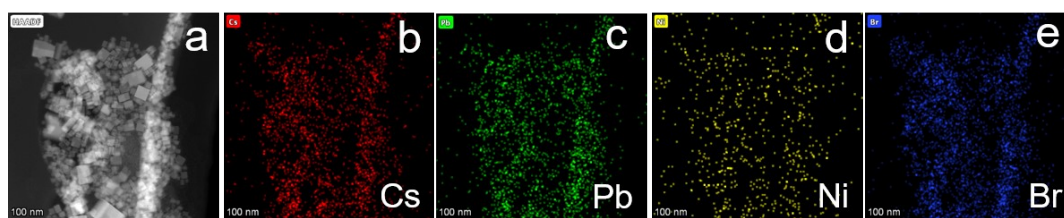

Fig. S3 (a) TEM image of  $\text{Ni}^{2+}$ -doped  $\text{CsPb}_2\text{Br}_5/\text{CsPbBr}_3$  NCs. (b)-(e) Elemental distribution mapping images of the Cs, Pb, Ni and Br in film detected by EDS mapping, respectively.

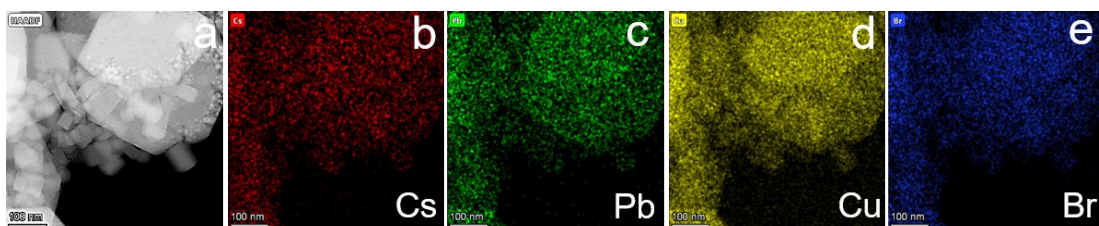

Fig. S4 (a) TEM image of  $\text{Cu}^{2+}$ -doped  $\text{CsPb}_2\text{Br}_5/\text{CsPbBr}_3$  NCs. (b)-(e) Elemental distribution mapping images of the Cs, Pb, Cu and Br in film detected by EDS mapping, respectively.

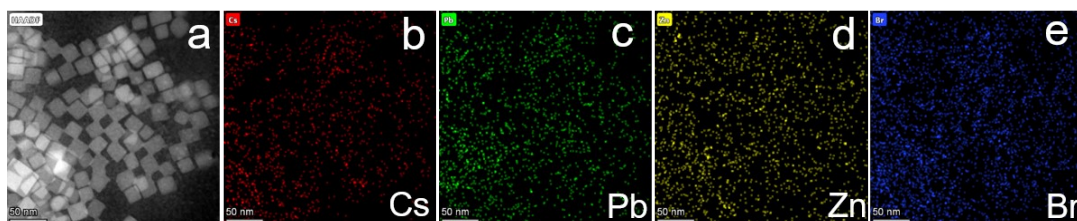

Fig. S5 (a) TEM image of  $\text{Zn}^{2+}$ -doped  $\text{CsPb}_2\text{Br}_5/\text{CsPbBr}_3$  NCs. (b)-(e) Elemental distribution mapping images of the Cs, Pb, Zn and Br in film detected by EDS mapping, respectively.

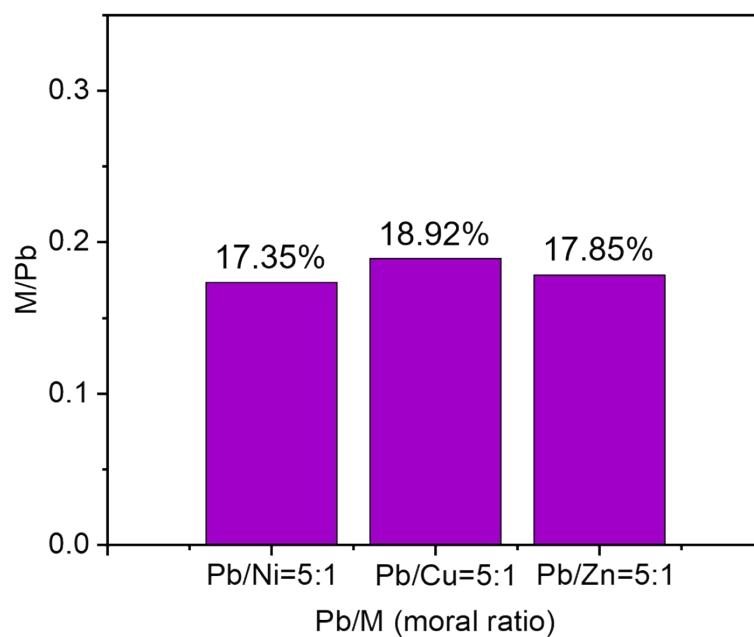

Fig. S6 The M/Pb values for the transition metal(II)-doped  $\text{CsPb}_2\text{Br}_5/\text{CsPbBr}_3$  NCs (determined via SEM-EDX) as a function of the different molar feed ratio of  $\text{PbBr}_2$  and  $\text{MBr}_2$  used in the synthesis ( $\text{M}=\text{Ni}^{2+}/\text{Cu}^{2+}/\text{Zn}^{2+}$ , respectively).

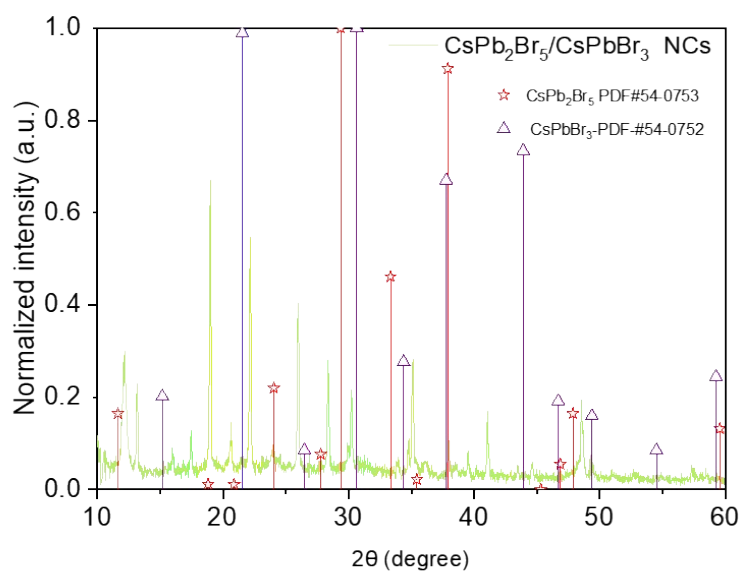

Fig. S7 The XRD pattern of as-obtained  $\text{CsPb}_2\text{Br}_5/\text{CsPbBr}_3$  NCs, together with the standard pattern of  $\text{CsPb}_2\text{Br}_5$  (red pentacle) and  $\text{CsPbBr}_3$  (blue triangle).

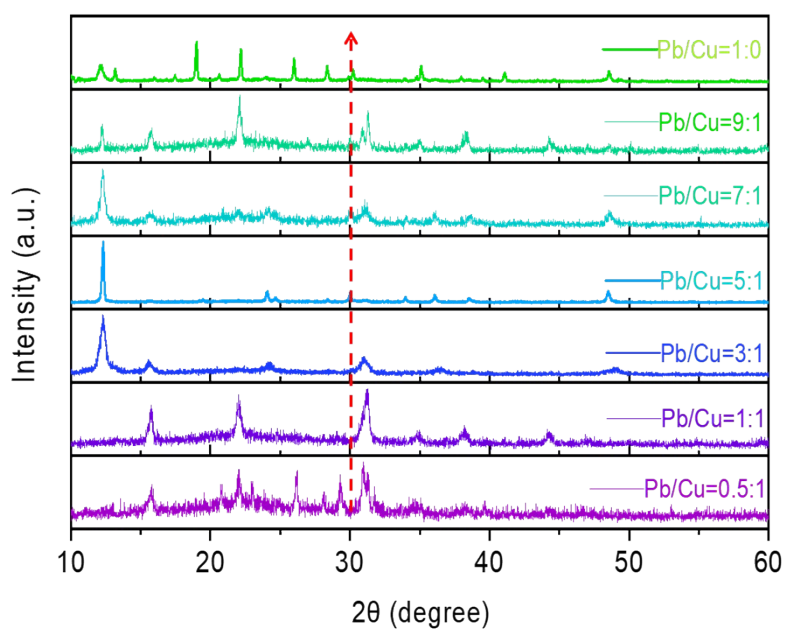

Fig. S8 The XRD patterns of the Cu<sup>2+</sup>-doped CsPb<sub>2</sub>Br<sub>5</sub>/CsPbBr<sub>3</sub> NCs.

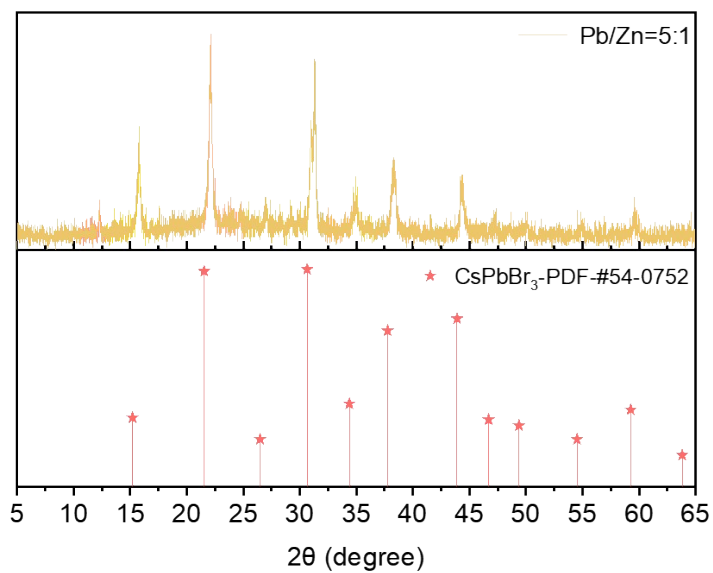

Fig. S9 The XRD pattern of Zn<sup>2+</sup>-doped CsPb<sub>2</sub>Br<sub>5</sub>/CsPbBr<sub>3</sub> NCs, together with the standard pattern of CsPbBr<sub>3</sub> (red pentacle).

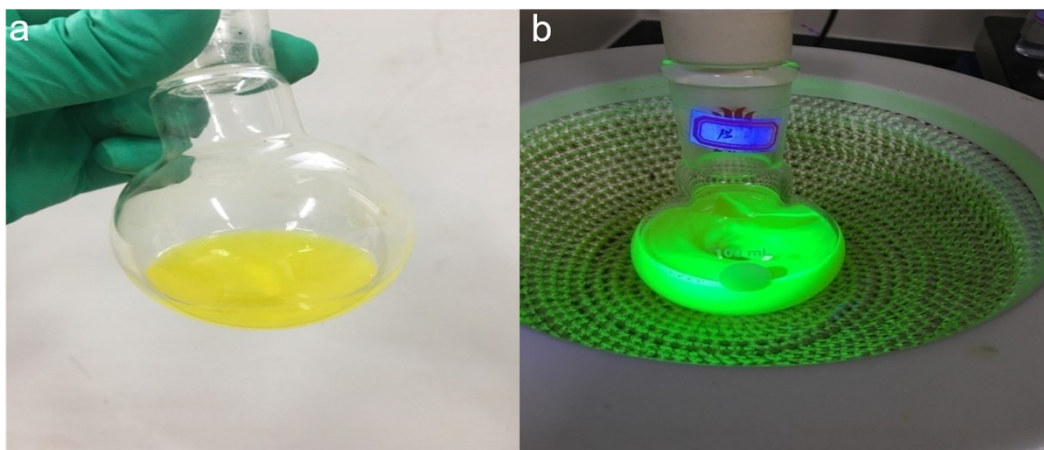

Fig. S10 The photos of colloidal  $\text{CsPb}_2\text{Br}_5/\text{CsPbBr}_3$  NCs solution under ambient conditions (a), and under 365 nm light irradiation (b).

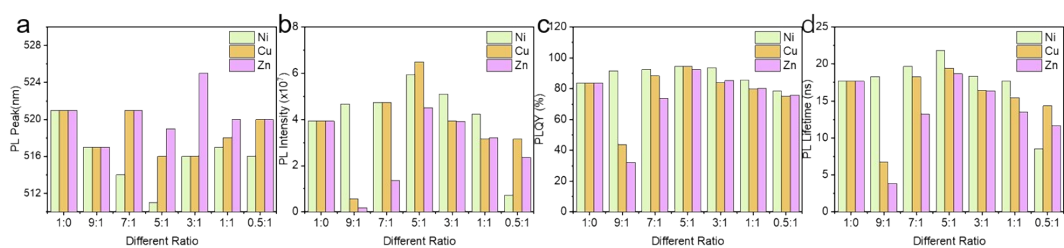

Fig. S11 Statistical plots of optical properties (PL peak and intensity, PLQY and PL lifetime) of different NCs.

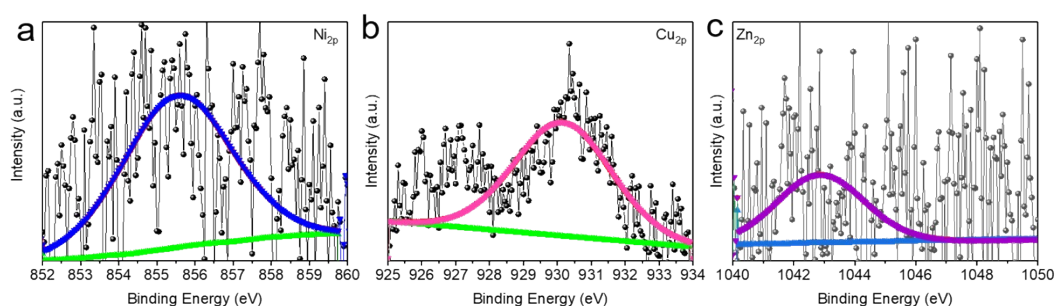

Fig. S12 The high-resolution XPS spectra measurement in the binding energy of  $\text{Ni}_{2p}$ ,  $\text{Cu}_{2p}$ , and  $\text{Zn}_{2p}$ .

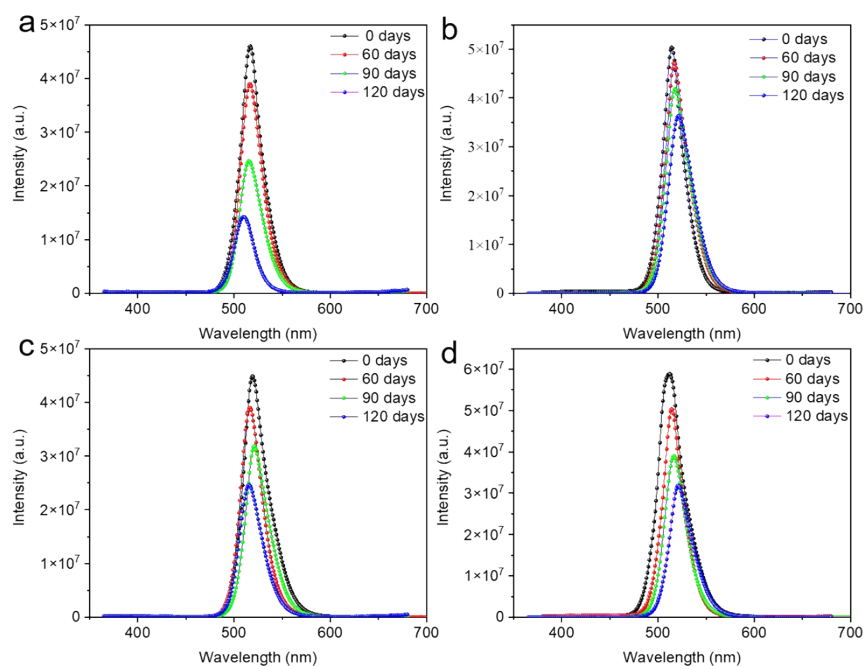

Fig. S13 PL spectrum of doped  $\text{CsPb}_2\text{Br}_5/\text{CsPbBr}_3$  NCs in solution: (a) undoped  $\text{CsPb}_2\text{Br}_5/\text{CsPbBr}_3$  NCs. (b)  $\text{Ni}^{2+}$ -doped  $\text{CsPb}_2\text{Br}_5/\text{CsPbBr}_3$  NCs (Pb/Ni=5:1), (c)  $\text{Cu}^{2+}$ -doped  $\text{CsPb}_2\text{Br}_5/\text{CsPbBr}_3$  NCs (Pb/Cu=5:1) and (d)  $\text{Zn}^{2+}$ -doped  $\text{CsPb}_2\text{Br}_5/\text{CsPbBr}_3$  NCs (Pb/Zn=5:1), respectively.

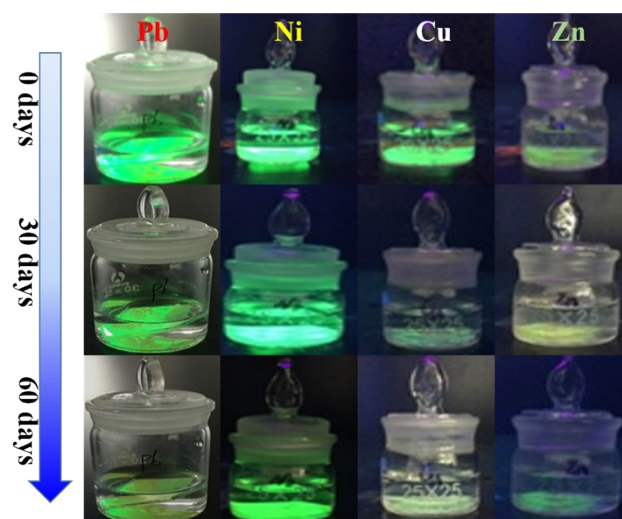

Fig. S14 The images of the films of based on the transition metal(II)-doped  $\text{CsPb}_2\text{Br}_5/\text{CsPbBr}_3$  NCs under the 4 mL water at 30 °C.

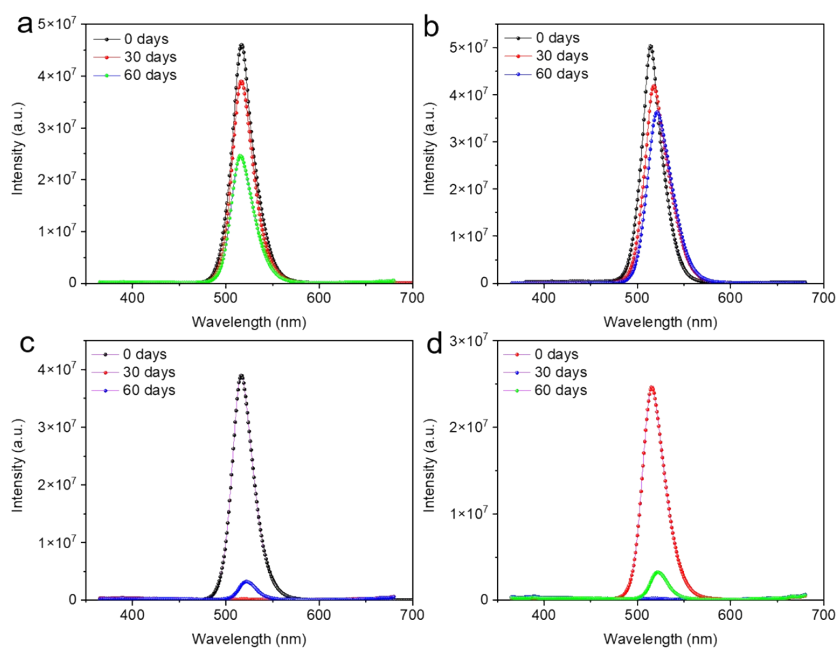

Fig. S15 PL spectrum of the films of based NCs under the 4 mL water: (a) undoped  $\text{CsPb}_2\text{Br}_5/\text{CsPbBr}_3$  NCs. (b)  $\text{Ni}^{2+}$ -doped  $\text{CsPb}_2\text{Br}_5/\text{CsPbBr}_3$  NCs ( $\text{Pb}/\text{Ni}=5:1$ ), (c)  $\text{Cu}^{2+}$ -doped  $\text{CsPb}_2\text{Br}_5/\text{CsPbBr}_3$  NCs ( $\text{Pb}/\text{Cu}=5:1$ ) and (d)  $\text{Zn}^{2+}$ -doped  $\text{CsPb}_2\text{Br}_5/\text{CsPbBr}_3$  NCs ( $\text{Pb}/\text{Zn}=5:1$ ), respectively.

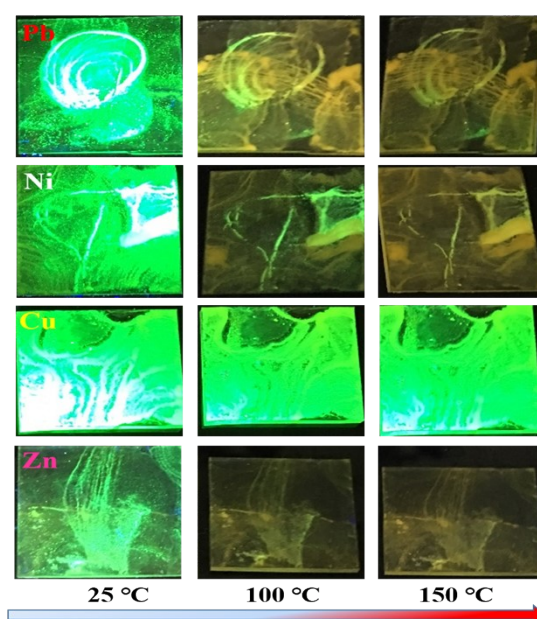

Fig. S16 The photos of the films of based on the transition metal(II)-doped  $\text{CsPb}_2\text{Br}_5/\text{CsPbBr}_3$  NCs with the different temperature.

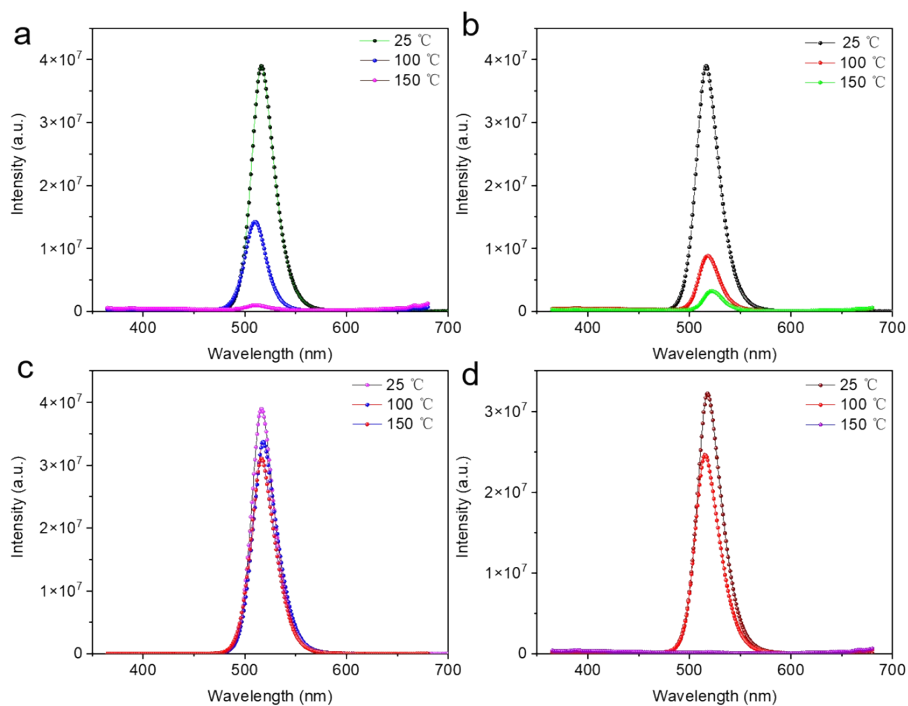

Fig. S17 Temperature-dependent PL spectrum of the films of based NCs: (a) Pure  $\text{CsPb}_2\text{Br}_5/\text{CsPbBr}_3$  NCs. (b)  $\text{Ni}^{2+}$ -doped  $\text{CsPb}_2\text{Br}_5/\text{CsPbBr}_3$  NCs (Pb/Ni=5:1), (c)  $\text{Cu}^{2+}$ -doped  $\text{CsPb}_2\text{Br}_5/\text{CsPbBr}_3$  NCs (Pb/Cu=5:1) and (d)  $\text{Zn}^{2+}$ -doped  $\text{CsPb}_2\text{Br}_5/\text{CsPbBr}_3$  NCs (Pb/Zn=5:1), respectively.

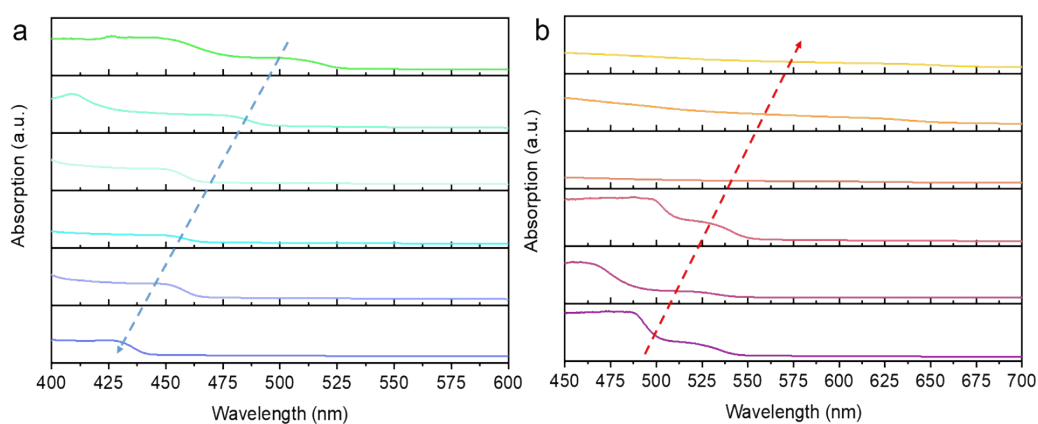

Fig. S18 Evolution of the optical absorption spectra of doped  $\text{CsPb}_2\text{Br}_5/\text{CsPbBr}_3$  NCs with increasing quantities of anion-exchange of (a)  $\text{Cl}^-$ , and  $\text{I}^-$  (b), respectively.

**Table S1.** Fitted PL lifetime of Ni<sup>2+</sup>-doped CsPb<sub>2</sub>Br<sub>5</sub>/CsPbBr<sub>3</sub> NCs (by bi-exponential decay).

| Ni <sup>2+</sup> -doped<br>CsPb <sub>2</sub> Br <sub>5</sub> /CsPbBr <sub>3</sub><br>NCs<br>(Pb/Ni) | Em-Wavelength<br>(nm) | Intensity<br>(x10 <sup>7</sup> a. u.) | FWHM<br>(nm) | T <sub>ave</sub><br>(ns) | PLQY<br>(%) | Γ <sub>rad</sub><br>μs <sup>-1</sup> | Γ <sub>non-rad</sub><br>μs <sup>-1</sup> |
|-----------------------------------------------------------------------------------------------------|-----------------------|---------------------------------------|--------------|--------------------------|-------------|--------------------------------------|------------------------------------------|
| 1:0                                                                                                 | 521                   | 3.933                                 | 23           | 17.69                    | 83.7        | 47.31                                | 9.21                                     |
| 9:1                                                                                                 | 517                   | 4.673                                 | 29           | 18.30                    | 91.5        | 49.99                                | 4.64                                     |
| 7:1                                                                                                 | 514                   | 4.739                                 | 24           | 19.67                    | 92.4        | 46.96                                | 3.86                                     |
| 5:1                                                                                                 | 511                   | 5.943                                 | 28           | 21.81                    | 94.6        | 43.36                                | 2.47                                     |
| 3:1                                                                                                 | 516                   | 5.096                                 | 28           | 18.36                    | 93.7        | 51.02                                | 3.43                                     |
| 1:1                                                                                                 | 517                   | 4.228                                 | 26           | 17.72                    | 85.7        | 48.35                                | 8.06                                     |
| 0.5:1                                                                                               | 516                   | 0.718                                 | 28           | 8.50                     | 78.6        | 920.39                               | 25.15                                    |

**Notes:** using the values of PLQY<sup>4</sup> and average lifetimes, we can evaluate the radiative and non-radiative decay rates of these QDs based on the following equations:<sup>5</sup>

$$\Gamma_{rad} = \frac{PLQY}{\tau_{ave}} \quad (1)$$

$$\Gamma_{non-rad} = \frac{1}{\tau_{ave}} - \Gamma_{rad} = \frac{1 - PLQY}{\tau_{ave}} \quad (2)$$

Among them, Γ<sub>rad</sub> stands for radiative recombination rates; Γ<sub>non-rad</sub> notes the non-radiative recombination rates; τ<sub>ave</sub> notes the average lifetime.

**Table S2.** Fitted PL lifetime of Cu<sup>2+</sup>-doped CsPb<sub>2</sub>Br<sub>5</sub>/CsPbBr<sub>3</sub> NCs (by bi-exponential decay).

| Cu <sup>2+</sup> -doped<br>CsPb <sub>2</sub> Br <sub>5</sub> /CsPbBr <sub>3</sub><br>NCs<br>(Pb/Cu) | Em-Wavelength<br>(nm) | Intensity<br>(10 <sup>7</sup> a. u.) | FWHM<br>(nm) | T <sub>ave</sub><br>(ns) | PLQY<br>(%) | Γ <sub>rad</sub><br>μs <sup>-1</sup> | Γ <sub>non-rad</sub><br>μs <sup>-1</sup> |
|-----------------------------------------------------------------------------------------------------|-----------------------|--------------------------------------|--------------|--------------------------|-------------|--------------------------------------|------------------------------------------|
| 1:0                                                                                                 | 521                   | 3.933                                | 23           | 17.69                    | 83.7        | 47.31                                | 9.21                                     |
| 9:1                                                                                                 | 517                   | 0.570                                | 20           | 6.75                     | 43.6        | 64.58                                | 83.54                                    |
| 7:1                                                                                                 | 521                   | 4.737                                | 26           | 18.25                    | 88.3        | 48.39                                | 6.41                                     |
| 5:1                                                                                                 | 516                   | 6.492                                | 29           | 19.45                    | 94.5        | 48.56                                | 2.82                                     |
| 3:1                                                                                                 | 516                   | 3.943                                | 28           | 16.43                    | 84.1        | 51.18                                | 9.67                                     |
| 1:1                                                                                                 | 518                   | 3.160                                | 27           | 15.44                    | 79.8        | 51.69                                | 13.08                                    |
| 0.5:1                                                                                               | 520                   | 3.150                                | 25           | 14.36                    | 75.1        | 52.30                                | 17.34                                    |

**Table S3.** Fitted PL lifetime of Zn<sup>2+</sup>-doped CsPb<sub>2</sub>Br<sub>5</sub>/CsPbBr<sub>3</sub> NCs (by bi-exponential decay).

| Zn <sup>2+</sup> -doped<br>CsPb <sub>2</sub> Br <sub>5</sub> /CsPbBr <sub>3</sub><br>NCs<br>(Pb/Zn) | Em-Wavelength<br>(nm) | Intensity<br>(10 <sup>7</sup> a. u.) | FWHM<br>(nm) | T <sub>ave</sub><br>(ns) | PLQY<br>(%) | Γ <sub>rad</sub><br>μs <sup>-1</sup> | Γ <sub>non-rad</sub><br>μs <sup>-1</sup> |
|-----------------------------------------------------------------------------------------------------|-----------------------|--------------------------------------|--------------|--------------------------|-------------|--------------------------------------|------------------------------------------|
| 1:0                                                                                                 | 521                   | 3.933                                | 23           | 17.69                    | 83.7        | 47.31                                | 9.21                                     |
| 9:1                                                                                                 | 517                   | 0.168                                | 23           | 3.84                     | 32.1        | 83.59                                | 176.82                                   |
| 7:1                                                                                                 | 521                   | 1.356                                | 25           | 13.19                    | 73.6        | 55.80                                | 20.01                                    |
| 5:1                                                                                                 | 519                   | 4.514                                | 28           | 18.69                    | 92.5        | 49.48                                | 4.01                                     |
| 3:1                                                                                                 | 525                   | 3.920                                | 28           | 16.38                    | 85.3        | 52.07                                | 8.97                                     |
| 1:1                                                                                                 | 520                   | 3.204                                | 28           | 13.53                    | 80.4        | 59.43                                | 14.48                                    |
| 0.5:1                                                                                               | 520                   | 2.357                                | 28           | 11.67                    | 75.8        | 64.93                                | 20.73                                    |

**Table S4.** Optical parameters of the transition metal(II)-doped CsPb<sub>2</sub>Br<sub>5</sub>/CsPbBr<sub>3</sub> NCs exchange with Cl<sup>-</sup>.

| LiCl<br>concentration | Em-Wavelength<br>(nm) | Band energy <sup>a</sup><br>(eV) | FWHM<br>(nm) |
|-----------------------|-----------------------|----------------------------------|--------------|
| 0.4578 M              | 452                   | 2.75                             | 16           |
| 0.2289M               | 465                   | 2.67                             | 17           |
| 0.1144M               | 487                   | 2.55                             | 21           |
| 0.0572M               | 500                   | 2.49                             | 23           |
| 0.0382M               | 509                   | 2.44                             | 20           |
| 0.0286M               | 515                   | 2.41                             | 22           |

<sup>a</sup>The acquired diffuse reflectance (DR) spectrum was converted to the Kubelka-Munk function  $F(R)$ ,<sup>6</sup> which is approximately proportional to the absorption coefficient, according to the relation  $F(R)=(1-R)/(2R)$ , where R is the diffuse reflectivity.

**Table S5.** Optical parameters of the transition metal(II)-doped CsPb<sub>2</sub>Br<sub>5</sub>/CsPbBr<sub>3</sub> NCs exchange with I<sup>-</sup>.

| LiI<br>concentration | Em-Wavelength<br>(nm) | Band energy <sup>a</sup><br>(eV) | FWHM<br>(nm) |
|----------------------|-----------------------|----------------------------------|--------------|
| 0.0085M              | 527                   | 2.36                             | 22           |
| 0.0106M              | 553                   | 2.25                             | 30           |
| 0.0142M              | 587                   | 2.12                             | 28           |
| 0.0213M              | 626                   | 1.99                             | 38           |
| 0.0425M              | 640                   | 1.94                             | 37           |
| 0.0850M              | 654                   | 1.90                             | 37           |

## References

- 1 J. Xun, J. Deng, W. Shen, M. Li and R. He, *Opt. Mater.*, 2021, **122**, 111799.
- 2 J. Xun, J. Deng, W. Shen, M. Li and R. He, *J. Alloys Compd.*, 2021, **872**, 159612.
- 3 J. Deng, J. Xun and R. He, *Opt. Mater.*, 2020, **99**, 109528.
- 4 Q. A. Akkerman, V. D’Innocenzo, S. Accornero, A. Scarpellini, A. Petrozza, M. Prato and L. Manna, *J. Am. Chem. Soc.*, 2015, **137**, 10276-10281.
- 5 E. Torres and T. P. Kaloni, *Comp. Mater. Sci.*, 2020, **171**, 109237.
- 6 Y. Yamada, T. Nakamura, M. Endo, A. Wakamiya and Y. Kanemitsu, *Appl. Phys. Express.*, 2014, **7**, 032302.
